CORRECTION

# Correction: Efficacy and Safety Assessment of the Addition of Bevacizumab to Adjuvant Therapy Agents in Cancer Patients: A Systematic Review and Meta-Analysis of Randomized Controlled Trials

Fariba Ahmadizar, N. Charlotte Onland-Moret, Anthonius de Boer, Geoffrey Liu, Anke H. Maitland-van der Zee

The phrases “log hazard ratio” and “log HR” appear incorrectly throughout the article and Supporting Information files, with the exception of the “Data analysis” subsection, Fig 5, and Fig 6. The correct terminology in all other cases should be “hazard ratio” and “HR.”

## Reference

1. Ahmadizar F, Onland-Moret NC, de Boer A, Liu G, Maitland-van der Zee AH (2015) Efficacy and Safety Assessment of the Addition of Bevacizumab to Adjuvant Therapy Agents in Cancer Patients: A Systematic Review and Meta-Analysis of Randomized Controlled Trials. PLoS ONE 10(9): e0136324. doi: [10.1371/journal.pone.0136324](https://doi.org/10.1371/journal.pone.0136324) PMID: [26331473](https://pubmed.ncbi.nlm.nih.gov/26331473/)

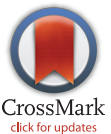

## OPEN ACCESS

**Citation:** Ahmadizar F, Onland-Moret NC, de Boer A, Liu G, Maitland-van der Zee AH (2015) Correction: Efficacy and Safety Assessment of the Addition of Bevacizumab to Adjuvant Therapy Agents in Cancer Patients: A Systematic Review and Meta-Analysis of Randomized Controlled Trials. PLoS ONE 10(10): e0141704. doi:10.1371/journal.pone.0141704

**Published:** October 22, 2015

**Copyright:** © 2015 Ahmadizar et al. This is an open access article distributed under the terms of the [Creative Commons Attribution License](https://creativecommons.org/licenses/by/4.0/), which permits unrestricted use, distribution, and reproduction in any medium, provided the original author and source are credited.
